# Supplementary material for: Reduced Fertility Rate in Female with Crohn's Disease: A Population-Based Cohort Study in China
Source: Research Square preprint supplement (doi:10.21203/rs.3.rs-4637366/v1), 2024-07-26
Supplement: Supplementary file 1 [file 937fdcf09a50c600dbd541ad.docx]

| Age(years) | Live birth per 1000 person-years(95%CI) | | AFRR (95%CI) | *p* |
| --- | --- | --- | --- | --- |
| Without perianal disease | With perianal disease |
| 15 - 19 | 6.90 (3.75 - 12.39) | - | - | - |
| 20 - 24 | 42.25 (33.75 - 52.72) | 6.15 (1.07 - 24.50) | 0.15 (0.04 - 0.59) | 0.007 |
| 25 - 29 | 114.57 (99.16 - 131.97) | 47.52 (31.34 - 70.90 | 0.41 (0.27 - 0.63) | <0.001 |
| 30 - 34 | 79.58 (64.95 - 97.08) | 69.23 (46.95 - 100.33) | 0.87 (0.58 - 1.32) | 0.524 |
| 35 - 39 | 36.27 (24.68 - 52.67) | 21.73 (8.87 - 49.02) | 0.60 (0.25 - 1.43) | 0.255 |
| 40 - 44 | 6.88 (1.78 - 21.71) | - | - | - |

Table S3 Age-Specific Fertility Rates in Patients Without and With Perianal Disease
