# Supplementary material for: Reduced Fertility Rate in Female with Crohn's Disease: A Population-Based Cohort Study in China
Source: Research Square preprint supplement (doi:10.21203/rs.3.rs-4637366/v1), 2024-07-26
Supplement: Supplementary file 2 [file bc6ab02dd5a434241fd30b4e.docx]

| Age(years) | Live birth per 1000 person-years(95%CI) | | AFRR (95%CI) | p |
| --- | --- | --- | --- | --- |
| Pre-disease | Post-disease |
| 15 - 19 | 6.88 (3.62 - 12.68) | 5.78 (0.30 - 36.68) | 0.84 (0.11 - 6.50) | 0.867 |
| 20 - 24 | 50.52 (40.06 - 63.43) | 9.64 (4.23 - 20.68) | 0.19 (0.09 - 0.41) | <0.001 |
| 25 - 29 | 141.89 (121.44 - 165.05) | 51.72 (39.12 - 67.94) | 0.36 (0.27 - 0.50) | <0.001 |
| 30 - 34 | 88.41 (68.80 - 112.73) | 67.76 (52.26 - 87.25) | 0.77 (0.54 - 1.10) | 0.147 |
| 35 - 39 | 38.89 (22.60 - 65.91) | 29.07 (18.32 - 45.34) | 0.75 (0.38 - 1.48) | 0.404 |
| 40 - 44 | 6.90 (0.36 - 43.57) | 4.45 (0.77 - 17.80) | 0.65 (0.06 - 7.12) | 0.721 |

Table S1 Age-Specific Fertility Rates Pre- and Post-Disease Onset
