# Supplementary material for: Reduced Fertility Rate in Female with Crohn's Disease: A Population-Based Cohort Study in China
Source: Research Square preprint supplement (doi:10.21203/rs.3.rs-4637366/v1), 2024-07-26
Supplement: Supplementary file 3 [file e991e43798452828a32fcfe5.docx]

| Age(year) | Live birth per 1000 person-years (95%CI) | | AFRR (95%CI) | p |
| --- | --- | --- | --- | --- |
| Pre-bowel surgery | Post-bowel surgery |
| 15 - 19 | 6.82 (3.70 - 12.25) | - | - | - |
| 20 - 24 | 37.85 (30.26 - 47.19) | 11.90 (0.62 - 73.75) | 0.31 (0.04 - 2.26) | 00.250 |
| 25 - 29 | 101.88 (88.51 - 116.98） | 62.20 (34.92 - 106.40) | 0.61 (0.35 - 1.07) | 00.086 |
| 30 - 34 | 77.21 (63.73 - 93.19) | 75.47 (45.16 - 121.87) | 0.98 (0.58 - 1.66) | 00.932 |
| 35 - 39 | 35.41 (24.26 - 51.10) | 21.83 (8.07 - 53.05) | 0.62 (0.24 - 1.59) | 00.318 |
| 40 - 44 | 5.15 (0.89 - 20.56) | 4.85 (0.25 - 30.92) | 0.94 (0.09 - 10.39) | 00.961 |

Table S2 Age-Specific Fertility Rates Pre- and Post-bowel Surgery
